# Supplementary figures and images for: Handheld recirculation system and customized media for microfluidic cell culture
Source: Royal Society of Chemistry journal article supplement (doi:10.1039/b510901a), 2005-12-05

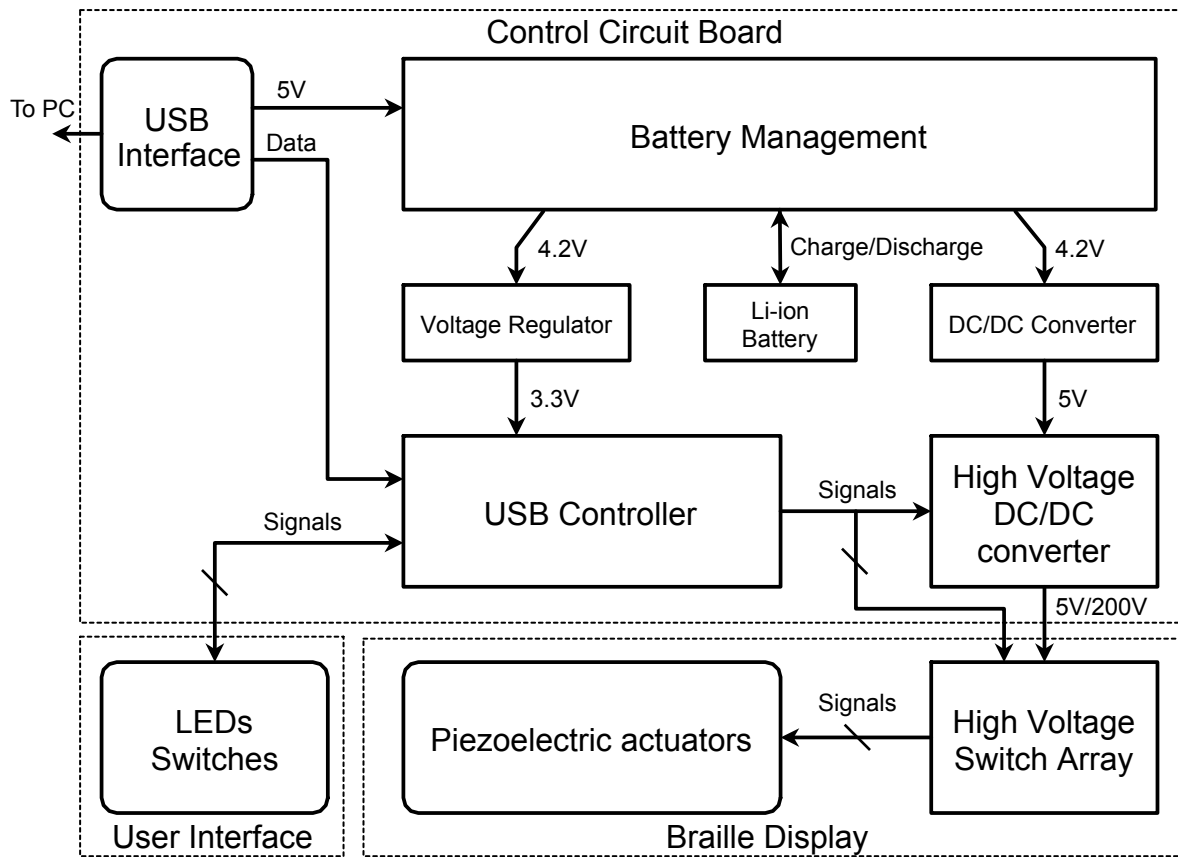

Supplement: fig1.pdf [file fig1.pdf]
